# Supplementary material for: Frequency and duration of physical activity bouts in school-aged children: A comparison within and between days
Source: PubMed Central journal article supplement (PMC5107648; doi:10.1016/j.pmedr.2016.10.007), 2016-10-26
Supplement: mmc1.pdf [file mmc1.pdf]

**Supplementary table 1. Full models used to examining associations of time-segment specific mean bout frequency and duration with overall PA volume**

| Time-segment                | Weekday       |                |         | Weekend       |                |         | In-school     |                |         | Out-of-school |                |         |
|-----------------------------|---------------|----------------|---------|---------------|----------------|---------|---------------|----------------|---------|---------------|----------------|---------|
|                             | $\beta$ Coef. | 95% CI         | P-value | $\beta$ Coef. | 95% CI         | P-value | $\beta$ Coef. | 95% CI         | P-value | $\beta$ Coef. | 95% CI         | P-value |
| <b>Bout characteristic</b>  |               |                |         |               |                |         |               |                |         |               |                |         |
| Frequency                   | 37.3          | (35.1, 39.6)   | <0.001* | 22.0          | (19.1, 25.0)   | <0.001* | 46.6          | (40.6, 52.6)   | <0.001* | 51.5          | (48.1, 54.9)   | <0.001* |
| Duration                    | 15.2          | (11.2, 19.2)   | <0.001* | 10.4          | (4.3, 16.4)    | 0.002*  | 8.4           | (5.4, 11.4)    | <0.001* | 10.8          | (6.8, 14.8)    | <0.001* |
| <b>Sex</b>                  |               |                |         |               |                |         |               |                |         |               |                |         |
| Boys                        | Ref           |                |         | Ref           |                |         | Ref           |                |         | Ref           |                |         |
| Girls                       | -6.2          | (-18.0, 5.7)   | 0.296   | -37.9         | (-53.3, -22.5) | <0.001* | -42.9         | (-59.4, -26.4) | <0.001* | -27.8         | (-39.3, -16.2) | <0.001* |
| <b>Age</b>                  |               |                |         |               |                |         |               |                |         |               |                |         |
|                             | -21.2         | (-23.2, -19.2) | <0.001* | -20.8         | (-24.1, -17.5) | <0.001* | -25.6         | (-28.2, -22.9) | <0.001* | -21.9         | (-23.9, -19.8) | <0.001* |
| <b>Ethnicity</b>            |               |                |         |               |                |         |               |                |         |               |                |         |
| Non-Hispanic White          | Ref           |                |         | Ref           |                |         | Ref           |                |         | Ref           |                |         |
| Non-Hispanic black          | -16.9         | (-35.0, 1.2)   | 0.066   | 15.9          | (-4.6, 36.4)   | 0.124   | 19.1          | (-5.9, 44.1)   | 0.129   | -23.3         | (-42.6, -4.0)  | 0.020*  |
| Mexican American            | -36.9         | (-52.2, -21.5) | <0.001* | -3.8          | (-23.8, 16.3)  | 0.704   | -34.5         | (-54.3, -14.6) | 0.001*  | -20.4         | (-37.7, -3.1)  | 0.022*  |
| Other                       | -29.0         | (-48.6, -9.4)  | 0.005*  | -15.6         | (-39.5, 8.3)   | 0.193   | -30.6         | (-57.6, -3.6)  | 0.028*  | -25.7         | (-47.9, -3.6)  | 0.024*  |
| <b>Age-standardised BMI</b> |               |                |         |               |                |         |               |                |         |               |                |         |
|                             | -1.2          | (-2.5, 0.1)    | 0.062   | -3.2          | (-4.5, -2.0)   | <0.001* | -4.2          | (-6.0, -2.4)   | <0.001* | -1.1          | (-2.3, 0.1)    | 0.061   |
| <b>Parental education</b>   |               |                |         |               |                |         |               |                |         |               |                |         |
| Less than high school       | Ref           |                |         | Ref           |                |         | Ref           |                |         | Ref           |                |         |
| High school                 | 8.0           | (-14.5, 30.6)  | 0.474   | 7.1           | (-14.5, 28.7)  | 0.508   | 6.3           | (-17.3, 29.9)  | 0.591   | 14.1          | (-8.9, 37.2)   | 0.220   |
| Some college                | -0.5          | (-22.7, 21.7)  | 0.963   | 2.6           | (-16.6, 21.7)  | 0.786   | -2.5          | (-25.4, 20.3)  | 0.822   | -2.8          | (-22.9, 17.3)  | 0.776   |
| College graduate            | -19.2         | (-36.2, -2.2)  | 0.028*  | -11.1         | (-38.4, 16.1)  | 0.411   | -20.3         | (-41.8, 1.1)   | 0.062   | -9.0          | (-28.3, 10.3)  | 0.349   |

PA volume, physical activity volume; cpm, counts per minute;  $\beta$  Coef., beta-coefficient (unstandardized); 95% CI, 95% confidence interval; BMI, body mass index.

Linear regression models

Based on data from children in the United States National Health and Nutrition Examination Survey (NHANES) 2003-2006.

Analyses only included those children who performed at least one activity bout (weekdays, n=2674; weekend days, n=2171; in-school, n=2513; out-of-school, n=2582)

\*Statistically significant contribution in the regression analysis

**Supplementary table 2. Full models used to examining associations of time-segment specific mean bout frequency and duration with overall MVPA**

| Time-segment                | Weekday       |              |         | Weekend       |               |         | In-school     |               |         | Out-of-school |              |         |
|-----------------------------|---------------|--------------|---------|---------------|---------------|---------|---------------|---------------|---------|---------------|--------------|---------|
|                             | $\beta$ Coef. | 95% CI       | P-value | $\beta$ Coef. | 95% CI        | P-value | $\beta$ Coef. | 95% CI        | P-value | $\beta$ Coef. | 95% CI       | P-value |
| <b>Bout characteristic</b>  |               |              |         |               |               |         |               |               |         |               |              |         |
| Frequency                   | 6.8           | (6.5, 7.1)   | <0.001* | 3.9           | (3.6, 4.2)    | <0.001* | 8.9           | (8.0, 9.8)    | <0.001* | 9.0           | (8.5, 9.5)   | <0.001* |
| Duration                    | 2.1           | (1.7, 2.5)   | <0.001* | 1.1           | (0.4, 1.8)    | 0.004*  | 1.1           | (0.6, 1.6)    | <0.001* | 1.7           | (1.2, 2.1)   | <0.001* |
| <b>Sex</b>                  |               |              |         |               |               |         |               |               |         |               |              |         |
| Boys                        | Ref           |              |         | Ref           |               |         | Ref           |               |         | Ref           |              |         |
| Girls                       | -3.7          | (-5.0, -2.3) | <0.001* | -10.7         | (-13.0, -8.3) | <0.001* | -9.7          | (-12.3, -7.2) | <0.001* | -8.0          | (-9.8, -6.2) | <0.001* |
| <b>Age</b>                  |               |              |         |               |               |         |               |               |         |               |              |         |
|                             | -1.4          | (-1.7, -1.2) | <0.001* | -1.5          | (-2.0, -1.1)  | <0.001* | -2.2          | (-2.6, -1.8)  | <0.001* | -1.6          | (-1.9, -1.3) | <0.001* |
| <b>Ethnicity</b>            |               |              |         |               |               |         |               |               |         |               |              |         |
| Non-Hispanic White          | Ref           |              |         | Ref           |               |         | Ref           |               |         | Ref           |              |         |
| Non-Hispanic black          | 0.1           | (-1.9, 2.1)  | 0.956   | 6.3           | (4.0, 8.7)    | <0.001* | 6.6           | (3.3, 10.0)   | <0.001* | -0.7          | (-3.1, 1.7)  | 0.569   |
| Mexican American            | -2.6          | (-4.0, -1.2) | 0.001*  | 3.4           | (0.5, 6.2)    | 0.022*  | -2.5          | (-5.4, 0.4)   | 0.091   | 0.5           | (-1.7, 2.7)  | 0.663   |
| Other                       | -2.2          | (-4.4, -0.1) | 0.044*  | -0.3          | (-3.3, 2.8)   | 0.862   | -2.2          | (-6.5, 2.2)   | 0.315   | -1.6          | (-4.4, 1.1)  | 0.239   |
| <b>Age-standardised BMI</b> | -0.2          | (-0.4, -0.1) | 0.002*  | -0.5          | (-0.7, -0.3)  | <0.001* | -0.8          | (-1.0, -0.5)  | <0.001* | -0.2          | (-0.4, 0.0)  | 0.014*  |
| <b>Parental education</b>   |               |              |         |               |               |         |               |               |         |               |              |         |
| Less than high school       | Ref           |              |         | Ref           |               |         | Ref           |               |         | Ref           |              |         |
| High school                 | 0.6           | (-1.2, 2.3)  | 0.525   | 0.4           | (-2.5, 3.3)   | 0.796   | -0.3          | (-3.1, 2.5)   | 0.806   | 1.4           | (-1.0, 3.9)  | 0.241   |
| Some college                | -0.2          | (-2.1, 1.8)  | 0.868   | 0.4           | (-2.0, 2.9)   | 0.725   | -0.6          | (-3.2, 2.0)   | 0.654   | -0.6          | (-2.9, 1.7)  | 0.597   |
| College graduate            | -0.6          | (-2.4, 1.2)  | 0.499   | 1.4           | (-3.1, 6.0)   | 0.528   | -1.4          | (-4.8, 2.0)   | 0.413   | 1.2           | (-1.6, 4.0)  | 0.381   |

MVPA, moderate to vigorous intensity physical activity;  $\beta$  Coef., beta-coefficient (unstandardized); 95% CI, 95% confidence interval; BMI, body mass index.

Linear regression models

Based on data from children in the United States National Health and Nutrition Examination Survey (NHANES) 2003-2006.

Analyses only included those children who performed at least one activity bout (weekdays, n=2674; weekend days, n=2171; in-school, n=2513; out-of-school, n=2582)

\*Statistically significant contribution in the regression analysis
